# Supplementary material
Source: PubMed Central journal article supplement (PMC3606274)
Supplement: NIHMS424012-supplement-01.pdf [file NIHMS424012-supplement-01.pdf]

# Wason et al. Supplemental Figure 1

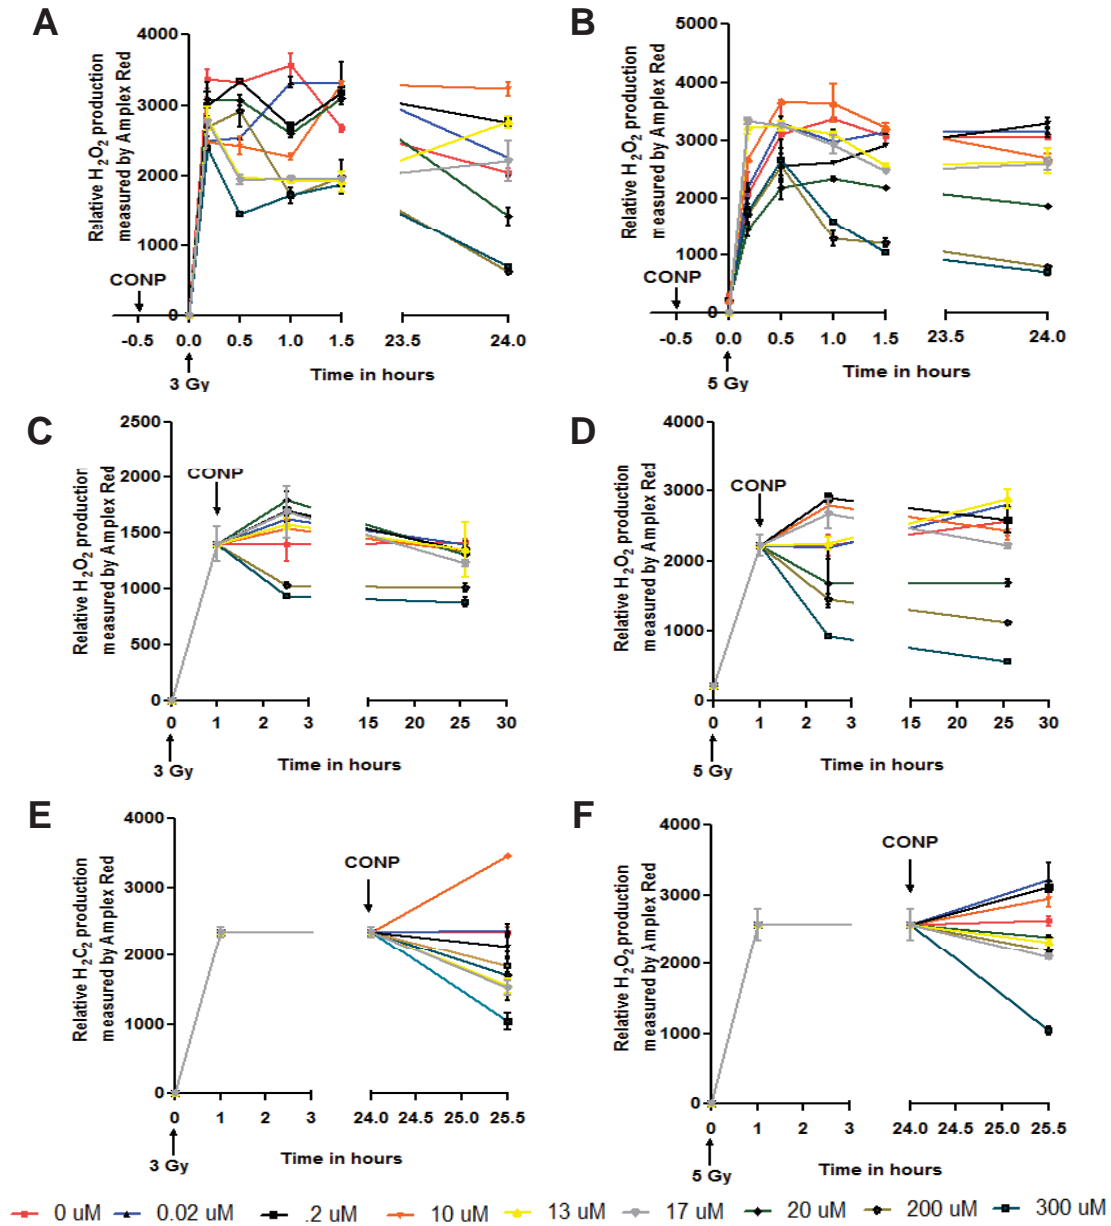

**Figure S1.** Supplemental to Fig. 2 showing all the CONP concentrations and time points examined. CONPs were included in water 0.5 h prior to RT (A & B), 1 h post-RT or 24 h post-RT. Time in hours, time point post-RT.

## Wason et al. Supplemental Figure 2

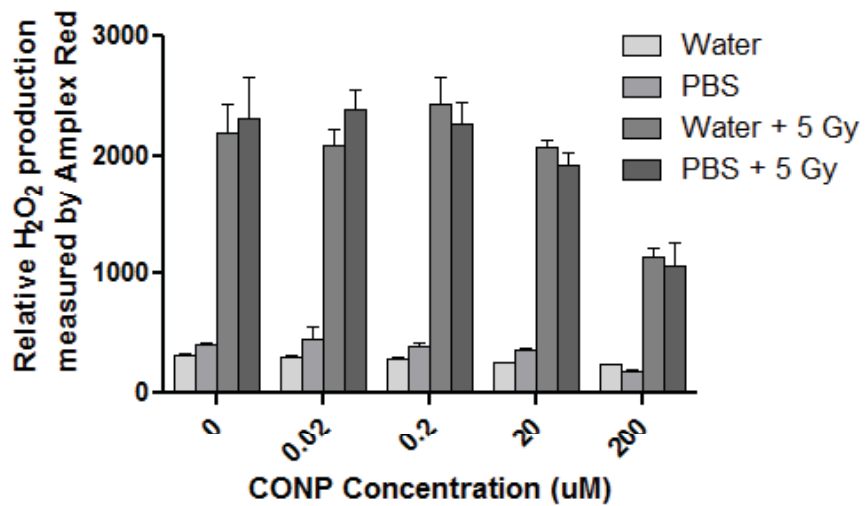

**Figure S2.** Supplemental to Fig. 2A & 2B showing that at neutral pH (7.4) H<sub>2</sub>O<sub>2</sub> production is comparable whether CONPs were suspended in water or in PBS.

## Wason et al. Supplemental Figure 3

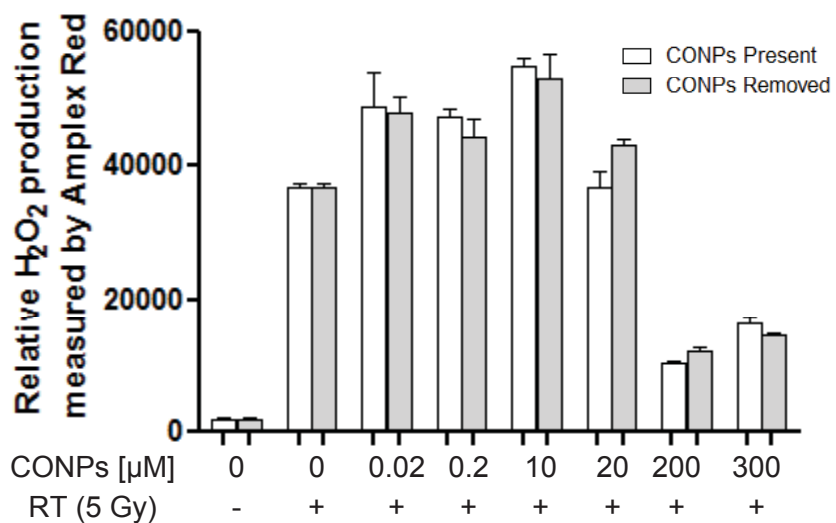

**Figure S3.** Supplemental to Fig. 2 & 3 showing CONP presence does not disturb recording of H<sub>2</sub>O<sub>2</sub> value by Amplex Red assay. CONPs were either left in the reaction (Present) or removed by centrifugation (Removed) prior to fluorescent analysis of H<sub>2</sub>O<sub>2</sub>.

# Wason et al. Supplemental Figure 4

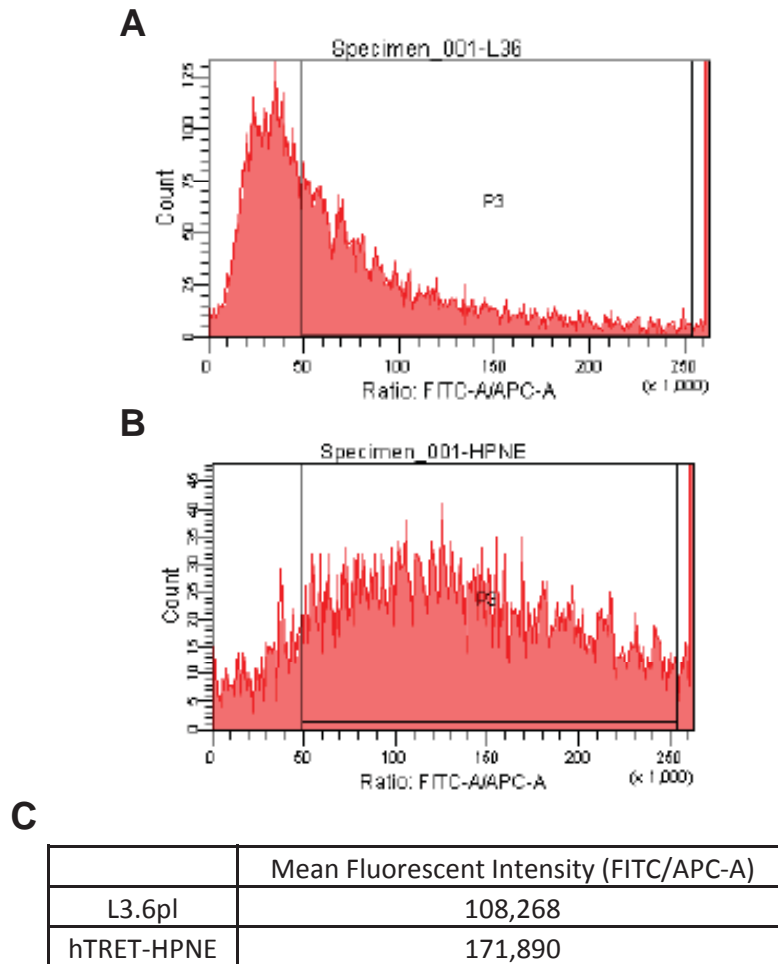

**Figure S4.** Supplemental to Fig. 4 showing that L3.6pl pancreatic cancer cells (A) are more acidic than hTRET-HPNE normal pancreatic epithelial cells (B). The acidity inside the cells was determined as described in Methods and presented as mean fluorescent intensity.

# Wason et al. Supplemental Figure 5

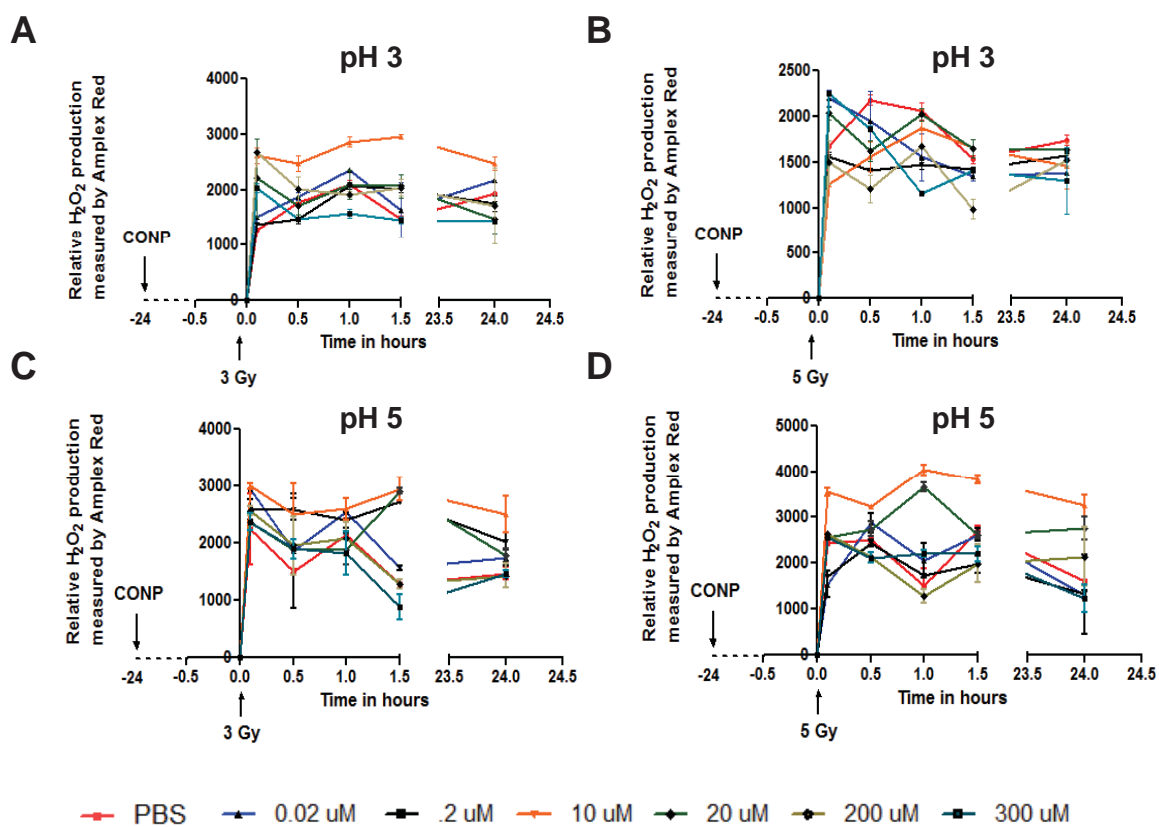

**Figure S5.** Supplemental to Fig. 3 Under acidic conditions showing CONPs lose the SOD mimetic ability to scavenge H<sub>2</sub>O<sub>2</sub> resulting in the accumulation of H<sub>2</sub>O<sub>2</sub>. Time in hours, time point relative to time 0 when radiation was done.
